1           **Anatomically remote education of B cells is required for colonic health**

2

3    Authors: Neeraj K. Surana<sup>1,2,4\*</sup>, Cheryn J. Couter<sup>1,2</sup>, David Alvarez<sup>1</sup>, Uli H. von Andrian<sup>1,3</sup>,

4    Dennis L. Kasper<sup>1\*</sup>

5

6    Affiliations:

7    <sup>1</sup>Department of Immunology, Harvard Medical School, Boston, MA, USA

8    <sup>2</sup>Division of Infectious Diseases, Department of Medicine, Boston Children's Hospital,

9    Boston, MA, USA

10   <sup>3</sup>The Ragon Institute of Massachusetts General Hospital, Massachusetts Institute of

11   Technology and Harvard University, Cambridge, MA, USA

12   <sup>4</sup>present address: Departments of Pediatrics, Molecular Genetics and Microbiology, and

13   Immunology, Duke University, Durham, NC, USA

14   \*Correspondence to: [neil.surana@duke.edu](mailto:neil.surana@duke.edu) or [dennis\\_kasper@hms.harvard.edu](mailto:dennis_kasper@hms.harvard.edu)

15 Abstract:

16 Mucosa-associated lymphoid tissues contain roughly 80% of all immune cells and produce  
17 virtually all of the body's IgA<sup>1-3</sup>. Although the majority of IgA-secreting cells educated  
18 within a mucosal site home back to the same anatomic region, some cells are also found in  
19 distant mucosal tissues<sup>2-6</sup>. These observations underlie the notion of a common mucosal  
20 immune system, which holds that anatomically unrelated mucosal sites are functionally  
21 connected by a shared immune system<sup>2,3</sup>. However, the ontological basis of this separation  
22 between site of immune education and functionality has remained elusive. Here we show  
23 that mice lacking Peyer's patches (PPs)—small-intestinal lymphoid tissue covered by  
24 antigen-sampling M cells—have no immunologic defect in the small-intestinal lamina  
25 propria. Surprisingly, the primary immunological abnormality in PP-deficient mice was a  
26 reduction in colonic B cells, including plasmablasts but not plasma cells. Adoptive transfer  
27 experiments conclusively demonstrated that PP-derived cells preferentially give rise to  
28 colonic—but not small-intestinal—B cells and plasmablasts. Finally, these PP-derived  
29 colonic B cells were critical for restraining colonic inflammation. Thus, PPs bridge the  
30 small-intestinal and colonic immune systems and provide a clear example of immune  
31 education being required in an anatomic compartment distinct from the effector site. Our  
32 findings, which highlight that the majority of fecal IgA is produced by colonic plasmablasts  
33 that originate from PPs, will help inform design of mucosal vaccines.

34

35

36 Main Text:

37           It has long been known that the mucosal immune system is functionally interrelated,  
38 with antigens delivered to one mucosal site evoking an immune response in remote  
39 mucosal tissues<sup>2,3,7</sup>. Although mucosal lymphocytes have an anatomic affinity for the  
40 mucosa of origin, these cells and their antibodies can be found throughout mucosa-  
41 associated lymphoid tissues and, to a lesser extent, systemic compartments<sup>2-6</sup>. While it is  
42 known that there is some compartmentalization within this common mucosal immune  
43 system<sup>2,3</sup>, it remains unclear whether this anatomic separation between site of education  
44 and functionality is essential to maintaining immune homeostasis.

45           Given that Peyer's patches (PPs)—small-intestinal subepithelial lymphoid  
46 aggregates that are covered by a follicle-associated epithelium, including M cells that are  
47 specialized for the uptake and delivery of luminal antigens to underlying immune cells—  
48 are a primary site for immune education within the small intestine<sup>1</sup>, we explored how PPs  
49 influence the immune system. Pregnant mice were injected at embryonic day 14 (E14) or  
50 E15 with an antibody to interleukin (IL) 7R $\alpha$ , thereby preventing formation of PPs in their  
51 pups<sup>8</sup>. Unlike genetically deficient animals that lack PPs, this approach involves only a  
52 transient depletion of lymphocytes during a critical window in embryogenesis and has  
53 been demonstrated not to affect formation of small-intestinal isolated lymphoid follicles,  
54 the cecal patch, or mesenteric lymph nodes (MLNs)<sup>8,9</sup>. We found that colonic patches are  
55 similarly unaffected (data not shown).

56           Given that M cell formation is dependent on signals from PPs<sup>1,10</sup>, we reasoned that  
57 PP-deficient mice also lack M cells. Consistent with this hypothesis, we found that PP-  
58 deficient mice have fewer viable commensal organisms in the MLNs that drain the small

59 intestine than do control mice (Fig. 1A); this observation highlighted the critical role M  
60 cells play in transcytosing small-intestinal bacteria<sup>1,11</sup>. Furthermore, we found that PP-  
61 deficient mice orally infected with *Salmonella enterica* serotype Typhimurium—a pathogen  
62 known to adhere to and invade via M cells<sup>12</sup>—have a lower small-intestinal burden of  
63 mucosa-associated *Salmonella* than do control mice (Fig. 1B), a result further suggesting  
64 reduced M cell number and/or function. Indeed, flow cytometric analysis of small-intestinal  
65 epithelial cells revealed reduced numbers of GP2<sup>+</sup> cells, a marker for M cells<sup>13</sup>, in PP-  
66 deficient mice (Fig. 1C). Moreover, examination of the distal ileum of PP-deficient mice by  
67 transmission electron microscopy demonstrated a complete lack of M cells (Fig. 1D).  
68 Finally, consistent with the notion that PPs are a critical inductive site for intestinal  
69 immunity, PP-deficient mice have drastically reduced levels of fecal IgA (Fig. 1E). Thus,  
70 mice treated with an antibody to IL-7R $\alpha$  at E14 or E15 have a specific loss of Peyer's  
71 patches and M cells, with a resulting defect in IgA production.

72 To more fully understand the impact of PPs on development of the immune system,  
73 we performed flow cytometric analyses of various immune compartments. Consistent with  
74 previous reports, the loss of PPs has no impact on the number of CD45<sup>+</sup> lymphocytes in the  
75 spleen, MLNs, or small-intestinal lamina propria (LP) (Fig. 2A)<sup>8,14,15</sup>. Thus, PPs are  
76 dispensable for the development of these immune organs. Surprisingly, PP-deficient mice  
77 have a lymphopenic colon (Fig. 2A). Further characterization of these cells suggested no  
78 change in the numbers of colonic TCR $\beta$ <sup>+</sup> cells, TCR $\gamma\delta$ <sup>+</sup> cells, or various myeloid cell  
79 populations (Fig. 2B, Extended Data Fig 1); rather, there is a significant decrease in the  
80 frequency and number of colonic CD19<sup>+</sup> cells (Fig. 2C, 2D). The fact that this decrease in  
81 colonic B cells accounted for more than two-thirds of the decrease in colonic CD45<sup>+</sup> cells

82 indicated that this is the primary cell population lost in the colons of PP-deficient mice.  
83 This unexpected finding raised the question of whether PPs are important for the  
84 accumulation of B cells in other mucosal sites. To address this question, we examined the  
85 lungs of PP-deficient mice and found that they have a normal frequency of B cells (Fig. 2E).  
86 Given that PPs are known to be a central site for the development of IgA-secreting B cells,  
87 we assessed whether IgA<sup>+</sup> B cells in the colon of PP-deficient mice are similarly affected.  
88 Intriguingly, PP-deficient mice have a decreased frequency and number of colonic  
89 B220<sup>+</sup>IgA<sup>+</sup> cells (plasmablasts) but no defect in colonic B220<sup>+</sup>IgA<sup>+</sup> cells (plasma cells) (Fig.  
90 2F, Extended Data Fig. 2A). In contrast, there is no difference from control mice in small-  
91 intestinal plasmablasts or plasma cells (Extended Data Fig. 2B). In summary, we have  
92 established that the absence of small-intestinal PPs affects the ontogeny of B cells,  
93 including plasmablasts, specifically in the colon—an anatomically remote site.

94         It is not clear how the loss of PPs leads to a decrease in colonic B cells. One  
95 possibility is that prenatal treatment with IL-7R $\alpha$  antibody affects—in addition to PP  
96 development—some other potential source of colonic B cells. It has been demonstrated  
97 that peritoneal B1 cells can accumulate in the small-intestinal LP, ultimately developing  
98 into plasma cells<sup>16</sup>. It is possible that PP-deficient mice also have a defect in a population of  
99 peritoneal B cells that ultimately traffics to the colon. Analyzing the number of CD19<sup>+</sup> cells  
100 in peritoneal lavage fluid, we found no difference between control and PP-deficient mice  
101 (Fig. 3A). Moreover, PP-deficient mice have a normal number of colonic B1 cells (CD19<sup>+</sup>  
102 CD43<sup>+</sup>), B1a cells (CD19<sup>+</sup> CD43<sup>+</sup> CD5<sup>+</sup>), B1b cells (CD19<sup>+</sup> CD43<sup>+</sup> CD5<sup>-</sup>), and regulatory B  
103 cells (CD19<sup>+</sup> CD43<sup>+</sup> CD5<sup>+</sup> CD1d<sup>+</sup>) (Extended Data Fig. 3 and data not shown); these results  
104 indicate that PP-deficient mice lack colonic B2 cells. In addition, it has recently been

105 reported that some colonic IgA-secreting cells originate from the cecal patch<sup>17</sup>; however,  
106 the normal number of cecal B cells in PP-deficient mice (Fig. 3B) suggests that the decrease  
107 in colonic B cells is not due to altered numbers of B cells in the cecum.

108         Given the growing body of evidence on the microbiota's impact on the development  
109 of the immune system<sup>7,18</sup>, we wondered whether *in utero* antibody treatment had affected  
110 the microbiota of the dams—and ultimately that of their pups—in a manner that  
111 specifically affects colonic B cells. To test this hypothesis, we transferred the fecal  
112 microbiota of control or PP-deficient mice into germ-free (GF) mice. Three weeks later, we  
113 assessed the frequency and number of colonic B cells in these mice. The lack of difference  
114 (Fig. 3C, Extended Data Fig. 4) proves that the colonic B-cell defect in PP-deficient mice is  
115 not due to an altered microbiota.

116         Finally, we considered the possibility that prenatal antibody treatment had affected  
117 B-cell trafficking—either the ability of B cells to home to the colon or the capacity of the  
118 colon to recruit B cells. Analysis of colonic levels of MADCAM1 (a receptor that enables  
119  $\alpha 4\beta 7$  integrin-expressing lymphocytes to home to the intestinal LP), CXCL13 (a chemokine  
120 that is selectively chemotactic for B cells), and CCL25 and CCL28 (chemokines relevant for  
121 homing of B cells to the small and large intestines, respectively) revealed no difference  
122 between control and PP-deficient mice (Extended Data Fig. 5), demonstrating that these  
123 trafficking molecules are not the cause of the colonic B-cell defect in PP-deficient mice. To  
124 more robustly examine B-cell trafficking, we performed parabiotic experiments using mice  
125 that were congenic for CD45 allotypes (i.e., CD45.1 and CD45.2) and were either PP-  
126 deficient or PP-sufficient (wild-type, WT) (Fig. 3D). As a control, we generated parabiotic  
127 pairs of congenic WT mice. As expected, expression of different CD45 allotypes does not

128 affect recruitment of B or T cells in the spleen, small intestine, or colon (Extended Data Fig.  
129 6). While PP-deficient mice have no defect in the recruitment of WT B or T cells in the  
130 spleen (Extended Data Fig. 7), there is a defect in the recruitment of B cells to the colon  
131 (Fig. 3E). Given that PP-deficient mice also have a defect in recruitment of B cells to the  
132 small intestine and of T cells to the colon and small intestine (without an alteration of cell  
133 numbers) (Extended Data Fig. 7), it is not clear that the recruitment defect of colonic B cells  
134 fully explains the decreased number of colonic B cells in PP-deficient mice.

135 An alternative explanation for the paucity of colonic B cells in PP-deficient mice is  
136 that a portion of colonic B cells are derived from PPs with no redundant source. If so, we  
137 reasoned that the number of colonic B cells should be correlated to that of PPs. Using WT  
138 (i.e., PP-sufficient) mice ranging in age from 1 to 18 weeks, we compared the number of B  
139 cells in the colon or small intestine with that in PPs. Strikingly, we found a strong  
140 correlation in B cell numbers between the colon and PPs (Spearman correlation 0.77;  
141  $p=0.002$ ) but not between the small intestine and PPs (Spearman correlation 0.00;  $p=0.99$ )  
142 (Fig. 3F). Of note, we remove PPs from the small intestine prior to analysis, but we are  
143 technically unable to excise colonic patches before analyzing the colon. If the correlation  
144 observed between colonic and PP B cells was due simply to the residual presence of a  
145 lymphoid structure in the colon, we predict that numbers of both B and T cells would be  
146 correlated given their shared trafficking route through lymphatics. As a control, we  
147 analyzed splenic lymphocyte numbers and found a robust correlation of both B and T cells  
148 in the spleen and PPs (Fig. 3F, 3G). However, there is no correlation between T cells in PPs  
149 and either the colon or small intestine (Fig. 3G). These results indicate that the colon-PP

150 correlation that is limited to B cells is due to something other than the presence of colonic  
151 patches and suggest a direct link between these B-cell populations.

152 Next, we exploited the fact that administration of the IL-7R $\alpha$  antibody at different  
153 gestational ages leads to a different number of PPs to test whether the number of PPs  
154 present in a mouse is similarly correlated to the number of colonic B cells (Extended Data  
155 Fig 8A)<sup>8</sup>. As in the previous experiment relying on mice of various ages, we found—using  
156 age-matched mice that differed only in the number of PPs—that the number of colonic B  
157 cells is tightly linked to the number of PPs (Extended Data Fig. 8B; Spearman correlation  
158 0.80;  $p=0.0009$ ). Analysis of mice that were exposed to the IL-7R $\alpha$  antibody at E18 and had  
159 a normal number of PPs revealed a number of colonic B cells similar to that in control mice  
160 and greater than that in PP-deficient animals (Fig. 3H). Taken together, these data  
161 effectively limit any potential off-target effect of the antibody to another structure that,  
162 similar to PPs, increases in number between E15 and E18 in an IL-7R $\alpha$ -dependent,  
163 stepwise fashion. Moreover, these correlations significantly strengthen the notion that PP-  
164 derived B cells form a distinct population of colonic B cells

165 To more conclusively determine whether a subset of colonic B cells is derived from  
166 PPs, we performed adoptive transfer experiments, injecting a mixture of PP cells (CD45.1<sup>+</sup>)  
167 and a 6-fold excess of splenocytes (CD45.1<sup>+</sup> CD45.2<sup>+</sup>) into PP-deficient mice (CD45.2<sup>+</sup>). If  
168 PPs truly represent a non-redundant source for a subpopulation of colonic B cells, we  
169 conjectured that the donor-derived B cells in the colon would contain a greater percentage  
170 of PP cells than the injected mixture. Indeed, while the small intestine contains the same  
171 fraction of PP-derived donor B cells as the input, significantly more PP-derived donor B  
172 cells are present in the colon of recipient mice (Fig. 3I). In contrast, the frequency of PP-

173 derived T cells in the colon does not increase (Extended Data Fig. 9). When we analyzed  
174 IgA<sup>+</sup> B cells in these mice, we found that PP-derived cells preferentially give rise to plasma  
175 cells (CD19<sup>-</sup> IgA<sup>+</sup>) in the small intestine (Fig. 3)]; this result was similar to that obtained by  
176 Craig and Cebra in seminal work<sup>6</sup>. Extending this work, we found significantly more PP-  
177 derived plasma cells in the colon as well. Interestingly, the colon—but not the small  
178 intestine—also contains significantly increased numbers of PP-derived plasmablasts  
179 (CD19<sup>+</sup> IgA<sup>+</sup>). These data confirm that PP-derived B cells, including plasmablasts,  
180 preferentially home to the colon to a greater degree than splenic B cells. Taken together,  
181 our data establish the existence of a cohort of colonic B cells that originates from PPs.

182 To determine whether these PP-derived colonic B cells are functionally important,  
183 we subjected mice to infection with *Citrobacter rodentium*, a model of enteropathogenic  
184 and enterohemorrhagic *Escherichia coli* infections in whose control B cells are central<sup>19,20</sup>.  
185 PP-deficient mice have fecal and colonic burdens of *C. rodentium* greater than those in  
186 control mice (Fig. 4A, 4B). Thus, the loss of PP-derived colonic B cells results in an inability  
187 to control infectious colitis.

188 Multiple studies have established that a subset of patients with Crohn's disease—  
189 particularly those with more severe disease—have elevated titers of autoantibodies to  
190 GP2<sup>21-23</sup>, a receptor present on M cells<sup>13</sup>. Therefore, it has been speculated that M cells and  
191 PPs may play a role in the pathogenesis of Crohn's disease<sup>24,25</sup>. To probe this hypothesis  
192 and assess whether PP-derived colonic B cells might specifically be involved, we exposed  
193 mice to trinitrobenzensulfonic acid (TNBS) in order to induce colitis in a murine model of  
194 Crohn's disease<sup>26</sup>. PP-deficient animals lose more weight and have higher disease scores  
195 than control mice (Fig. 4C, 4D). Moreover, animals that are exposed to the IL-7R $\alpha$  antibody

196 at E18 and have normal numbers of PPs and colonic B cells display disease activity similar  
197 to that in control animals and less severe than that in PP-deficient animals (Fig. 4D). These  
198 findings linking absent M cell and PP function with more severe colonic inflammation may  
199 provide a mechanistic explanation for the association of antibodies to GP2, which likely  
200 alter M-cell function, with more severe Crohn's disease. Taken together, these results  
201 establish that PP-derived colonic B cells are indispensable in controlling colonic health in  
202 both infectious and chemically induced forms of colitis.

203         The experiments reported herein demonstrate that PP-derived colonic B cells play a  
204 dramatic role in restraining colonic inflammation. We questioned whether these B cells  
205 regulate immune responses under healthy, homeostatic conditions. Although PP-deficient  
206 mice have dramatically lower levels of fecal IgA than do control mice (Fig. 1E), parabiosis  
207 to a PP-sufficient mouse, which allows migration of PP-derived B cells into the PP-deficient  
208 mouse, can restore fecal IgA levels (Fig. 4E). To examine regional differences in the  
209 production of IgA, we measured IgA levels in distal ileal contents as a measure of small-  
210 intestinal IgA. Surprisingly, PP-deficient mice have levels of small-intestinal IgA similar to  
211 those in control mice (Extended Data Fig. 10A)—an indication that the lack of PPs and the  
212 associated decrease in colonic plasmablasts result in a loss of IgA produced in the colon.  
213 Consistent with this finding, colonic segments from PP-deficient mice cultured *ex vivo*  
214 produce lower levels of IgA than those from control mice, whereas there is no difference  
215 between cultured ileal segments from the two groups (Fig. 4F, Extended Data Fig. 10B).  
216 These data support the finding that PPs are critical for IgA production and clarify that the  
217 bulk of fecal IgA originates in the colon, a finding consistent with human data<sup>27</sup>. Moreover,  
218 although counts of small-intestinal mucosal bacteria do not differ in the two groups of mice

219 (Extended Data Fig. 10C), this defect in colon-specific IgA results in an increased colonic  
220 burden of mucosal bacteria in PP-deficient mice (Fig. 4G), which is associated with the  
221 development of colitis in mice and humans<sup>28,29</sup>. Thus, PP-derived colonic B cells are crucial  
222 regulators of the colonic immune response in both healthy and inflammatory conditions.

223 Our findings provide a conclusive example of homeostatic antigen sampling in one  
224 mucosal compartment being required for the ontogeny and functionality of cells in a  
225 distant site. From a teleological perspective, it is not readily apparent why an anatomic  
226 defect in the small intestine would lead to an altered immune status specifically in the  
227 colon. However, the fundamental physiologic roles of the small and large intestines—  
228 namely, the small intestine samples and absorbs luminal contents (e.g., nutrients), and,  
229 except for regulating water homeostasis, the large intestine largely allows unfettered  
230 passage of luminal contents—may partially explain why small-intestinal sampling of  
231 antigen is important for the colonic immune response. The anatomic characteristics of  
232 PPs—increased interactions with antigens facilitated by the presence of little or no  
233 overlying mucus, the presence of M cells that actively sample luminal antigens, and the fact  
234 that PPs are more numerous than corresponding structures in the colon—may underlie  
235 their indispensable role in the ontogeny of colonic B cells. Drawing parallels to the  
236 thymus—a specialized lymphoid organ that facilitates maturation of T cells—we suggest  
237 that PPs may be similarly specialized lymphoid organs that facilitate education of colonic B  
238 cells. While isolated lymphoid follicles and/or other mucosal sources may be able to  
239 compensate for small-intestinal B cells, the lack of other redundant sources for colonic B  
240 cells makes PPs a critical immunological sentinel for the colon.

241

242 References

- 243 1 Kraehenbuhl, J. P. & Neutra, M. R. Epithelial M cells: differentiation and function.  
244 *Annu. Rev. Cell Dev. Biol.* **16**, 301-332, doi:10.1146/annurev.cellbio.16.1.301 (2000).
- 245 2 Holmgren, J. & Czerkinsky, C. Mucosal immunity and vaccines. *Nat. Med.* **11**, S45-53,  
246 doi:10.1038/nm1213 (2005).
- 247 3 Kunkel, E. J. & Butcher, E. C. Plasma-cell homing. *Nat. Rev. Immunol.* **3**, 822-829,  
248 doi:10.1038/nri1203 (2003).
- 249 4 Mora, J. R. *et al.* Selective imprinting of gut-homing T cells by Peyer's patch dendritic  
250 cells. *Nature* **424**, 88-93, doi:10.1038/nature01726 (2003).
- 251 5 Morton, A. M. *et al.* Endoscopic photoconversion reveals unexpectedly broad  
252 leukocyte trafficking to and from the gut. *Proc. Natl. Acad. Sci. U. S. A.* **111**, 6696-  
253 6701, doi:10.1073/pnas.1405634111 (2014).
- 254 6 Craig, S. W. & Cebra, J. J. Peyer's patches: an enriched source of precursors for IgA-  
255 producing immunocytes in the rabbit. *J. Exp. Med.* **134**, 188-200 (1971).
- 256 7 Surana, N. K. & Kasper, D. L. Deciphering the tete-a-tete between the microbiota and  
257 the immune system. *J. Clin. Invest.* **124**, 4197-4203, doi:10.1172/JCI72332 (2014).
- 258 8 Yoshida, H. *et al.* IL-7 receptor alpha+ CD3(-) cells in the embryonic intestine  
259 induces the organizing center of Peyer's patches. *Int. Immunol.* **11**, 643-655 (1999).
- 260 9 Hamada, H. *et al.* Identification of multiple isolated lymphoid follicles on the  
261 antimesenteric wall of the mouse small intestine. *J. Immunol.* **168**, 57-64 (2002).
- 262 10 Taylor, R. T. *et al.* Lymphotoxin-independent expression of TNF-related activation-  
263 induced cytokine by stromal cells in cryptopatches, isolated lymphoid follicles, and  
264 Peyer's patches. *J. Immunol.* **178**, 5659-5667 (2007).

- 265 11 Barreau, F. *et al.* CARD15/NOD2 is required for Peyer's patches homeostasis in mice.  
266 *PLoS One* **2**, e523, doi:10.1371/journal.pone.0000523 (2007).
- 267 12 Jones, B. D., Ghori, N. & Falkow, S. Salmonella typhimurium initiates murine infection  
268 by penetrating and destroying the specialized epithelial M cells of the Peyer's  
269 patches. *J. Exp. Med.* **180**, 15-23 (1994).
- 270 13 Hase, K. *et al.* Uptake through glycoprotein 2 of FimH(+) bacteria by M cells initiates  
271 mucosal immune response. *Nature* **462**, 226-230, doi:10.1038/nature08529 (2009).
- 272 14 Murai, M. *et al.* Peyer's patch is the essential site in initiating murine acute and lethal  
273 graft-versus-host reaction. *Nat. Immunol.* **4**, 154-160, doi:10.1038/ni879 (2003).
- 274 15 Heatley, R. V. *et al.* The effects of surgical removal of Peyer's patches in the rat on  
275 systemic antibody responses to intestinal antigen. *Immunology* **44**, 543-548 (1981).
- 276 16 Kroese, F. G. *et al.* Many of the IgA producing plasma cells in murine gut are derived  
277 from self-replenishing precursors in the peritoneal cavity. *Int. Immunol.* **1**, 75-84  
278 (1989).
- 279 17 Masahata, K. *et al.* Generation of colonic IgA-secreting cells in the caecal patch.  
280 *Nature communications* **5**, 3704, doi:10.1038/ncomms4704 (2014).
- 281 18 Slack, E., Balmer, M. L. & Macpherson, A. J. B cells as a critical node in the microbiota-  
282 host immune system network. *Immunol. Rev.* **260**, 50-66, doi:10.1111/imr.12179  
283 (2014).
- 284 19 Simmons, C. P. *et al.* Central role for B lymphocytes and CD4+ T cells in immunity to  
285 infection by the attaching and effacing pathogen *Citrobacter rodentium*. *Infect.*  
286 *Immun.* **71**, 5077-5086 (2003).

- 287 20 Vallance, B. A., Deng, W., Knodler, L. A. & Finlay, B. B. Mice lacking T and B  
288 lymphocytes develop transient colitis and crypt hyperplasia yet suffer impaired  
289 bacterial clearance during *Citrobacter rodentium* infection. *Infect. Immun.* **70**, 2070-  
290 2081 (2002).
- 291 21 Bonneau, J. *et al.* Systematic review: new serological markers (anti-glycan, anti-GP2,  
292 anti-GM-CSF Ab) in the prediction of IBD patient outcomes. *Autoimmunity reviews*  
293 **14**, 231-245, doi:10.1016/j.autrev.2014.11.004 (2015).
- 294 22 Roggenbuck, D. *et al.* Autoantibodies to GP2, the major zymogen granule membrane  
295 glycoprotein, are new markers in Crohn's disease. *Clin. Chim. Acta* **412**, 718-724,  
296 doi:10.1016/j.cca.2010.12.029 (2011).
- 297 23 Werner, L. *et al.* Identification of pancreatic glycoprotein 2 as an endogenous  
298 immunomodulator of innate and adaptive immune responses. *J. Immunol.* **189**,  
299 2774-2783, doi:10.4049/jimmunol.1103190 (2012).
- 300 24 Gullberg, E. & Soderholm, J. D. Peyer's patches and M cells as potential sites of the  
301 inflammatory onset in Crohn's disease. *Ann. N. Y. Acad. Sci.* **1072**, 218-232,  
302 doi:10.1196/annals.1326.028 (2006).
- 303 25 Roggenbuck, D. *et al.* Glycoprotein 2 antibodies in Crohn's disease. *Adv. Clin. Chem.*  
304 **60**, 187-208 (2013).
- 305 26 Scheiffele, F. & Fuss, I. J. Induction of TNBS colitis in mice. *Current protocols in*  
306 *immunology / edited by John E. Coligan ... [et al.]* **Chapter 15**, Unit 15 19,  
307 doi:10.1002/0471142735.im1519s49 (2002).

- 308 27 Peters, M. G. *et al.* Normal human intestinal B lymphocytes. Increased activation  
309 compared with peripheral blood. *J. Clin. Invest.* **83**, 1827-1833,  
310 doi:10.1172/JCI114088 (1989).
- 311 28 Johansson, M. E. *et al.* Bacteria penetrate the normally impenetrable inner colon  
312 mucus layer in both murine colitis models and patients with ulcerative colitis. *Gut*  
313 **63**, 281-291, doi:10.1136/gutjnl-2012-303207 (2014).
- 314 29 Sellon, R. K. *et al.* Resident enteric bacteria are necessary for development of  
315 spontaneous colitis and immune system activation in interleukin-10-deficient mice.  
316 *Infect. Immun.* **66**, 5224-5231 (1998).
- 317 30 Carter, P. B. & Collins, F. M. The route of enteric infection in normal mice. *J. Exp. Med.*  
318 **139**, 1189-1203 (1974).
- 319 31 Couter, C. J. & Surana, N. K. Isolation and Flow Cytometric Characterization of  
320 Murine Small Intestinal Lymphocytes. *J. Vis. Exp.* **111**, e54114, doi:10.3791/54114  
321 (2016).
- 322 32 Atarashi, K. *et al.* ATP drives lamina propria T(H)17 cell differentiation. *Nature* **455**,  
323 808-812, doi:10.1038/nature07240 (2008).
- 324 33 Ericsson, A., Kotarsky, K., Svensson, M., Sigvardsson, M. & Agace, W. Functional  
325 characterization of the CCL25 promoter in small intestinal epithelial cells suggests a  
326 regulatory role for caudal-related homeobox (Cdx) transcription factors. *J. Immunol.*  
327 **176**, 3642-3651 (2006).
- 328 34 Sahay, B. *et al.* Impaired colonic B-cell responses by gastrointestinal Bacillus  
329 anthracis infection. *J. Infect. Dis.* **210**, 1499-1507, doi:10.1093/infdis/jiu280 (2014).

330 35 Stary, G. *et al.* VACCINES. A mucosal vaccine against *Chlamydia trachomatis*  
331 generates two waves of protective memory T cells. *Science* **348**, aaa8205,  
332 doi:10.1126/science.aaa8205 (2015).

333 36 Wirtz, S., Neufert, C., Weigmann, B. & Neurath, M. F. Chemically induced mouse  
334 models of intestinal inflammation. *Nature protocols* **2**, 541-546,  
335 doi:10.1038/nprot.2007.41 (2007).

336 37 Chung, H. *et al.* Gut immune maturation depends on colonization with a host-specific  
337 microbiota. *Cell* **149**, 1578-1593, doi:10.1016/j.cell.2012.04.037 (2012).

338

339 Acknowledgements:

340 We thank Shakir Edwards for assistance with gnotobiotic mice; Roderick Bronson for  
341 review of histology; Julie McCoy for editorial assistance; and members of the Kasper lab for  
342 helpful discussions. Electron microscopy was performed at the Harvard Medical School EM  
343 Facility with assistance from Louise Trakimas and Maria Ericsson. N.K.S. was supported by  
344 NIH K08 AI108690 and a Career Development Award from Boston Children's Hospital.

345

346 Author contributions:

347 N.K.S. conceived the study, designed and performed experiments, and analyzed all data.

348 C.J.C. performed experiments. D.A. generated parabiotic mice. U.H.v.A. helped with data

349 interpretation. D.L.K. supervised all aspects of the project. N.K.S. and D.L.K. wrote the

350 paper. All authors discussed and commented on the manuscript.

351

## 352 **Materials and Methods**

### 353 **Mice**

354 Timed-pregnant Swiss Webster (SW) mice (Taconic Biosciences), timed-pregnant C57BL/6  
355 mice (Charles River and Jackson Laboratories), C57BL/6 mice (Jackson Laboratories), and  
356 B6.SJL-Ptprc<sup>a</sup>Pepc<sup>b</sup>/Boy mice (B6 CD45.1; Charles River and Jackson Laboratories) were  
357 maintained under specific pathogen-free conditions. C57BL/6 CD45.1<sup>+</sup> CD45.2<sup>+</sup> mice were  
358 bred at Harvard University. At E14, pregnant dams were injected intravenously with either  
359 2 mg of an antibody to IL-7R $\alpha$  (clone A7R34; Bio X Cell; West Lebanon, NH) or an isotype  
360 control (clone 2A3; Bio X Cell) to generate PP-deficient and control mice, respectively. For  
361 some experiments, pregnant dams were injected with the IL-7R $\alpha$  antibody on different  
362 days ranging between E15 and E18. GF SW mice were bred and maintained in vinyl  
363 isolators within the animal facility at Harvard University. For colonization experiments, GF  
364 SW mice were gavaged with 100  $\mu$ l of fecal extract prepared by homogenizing ~100 mg of  
365 feces from control or PP-deficient mice in 1 ml of PBS and filtering the mixture through a  
366 100- $\mu$ m cell strainer to remove particulate matter. Mice used in experiments were age-  
367 matched (typically 8-12 weeks old) and drawn randomly from the same litter, where  
368 feasible. The mice used in Figure 2 were 16-18 weeks old. All procedures were approved by  
369 the Harvard Medical Area Standing Committee on Animals and are in accordance with NIH  
370 guidelines.

371

### 372 **Bacterial culture of MLNs**

373 The middle segments of MLNs, which drain only the jejunum and the ileum<sup>30</sup>, were  
374 harvested from control and PP-deficient mice, pressed through a 70- $\mu$ m cell strainer, and

375 resuspended in 1 ml of PBS. Serial dilutions were plated on both trypticase soy agar with  
376 5% sheep blood (BD Biosciences) and *Brucella* agar with 5% sheep blood, hemin, and  
377 vitamin K<sub>1</sub> (BD Biosciences). Plates were incubated at 37°C in aerobic and anaerobic  
378 conditions (80% N<sub>2</sub>, 10% H<sub>2</sub>, 10% CO<sub>2</sub>), respectively, and colonies were counted after 24 h  
379 (aerobic) or 48 h (anaerobic).

380

### 381 **Bacterial infections**

382 *Salmonella* infections: *S. enterica* serovar Typhimurium strain SL1344 was grown overnight  
383 at 37°C in Luria-Bertani (LB) broth containing streptomycin (200 µg/ml). Control and PP-  
384 deficient C57BL/6 mice (12–15 weeks old) were gavaged with ~10<sup>8</sup> CFU and sacrificed 24  
385 h later. The distal 10 cm of the small intestine was harvested, flushed with PBS, and  
386 homogenized with a bead beater and 3.2-mm steel beads. Serial dilutions of the tissue  
387 homogenate were plated on LB/streptomycin agar, and colonies were counted after 24 h of  
388 incubation at 37°C.

389

390 *C. rodentium* infections: *C. rodentium* strain DBS100 (a kind gift from Lynn Bry, Brigham  
391 and Women's Hospital, Boston, MA) was grown overnight in LB broth. Control and PP-  
392 deficient C57BL/6 mice (16–20 weeks old) were gavaged with ~5 x 10<sup>8</sup> CFU. Fecal samples  
393 were collected periodically. The mice were sacrificed 8 days after infection, at which time  
394 the proximal 5 cm of colon was harvested and homogenized by bead beating. Serial  
395 dilutions of fecal and colonic homogenates were plated on MacConkey agar (BD). Colonies  
396 were counted after 24 h of incubation at 37°C; *C. rodentium* colonies were identified by  
397 their deep pink, slightly translucent appearance. As a control, fecal samples from

398 uninfected animals were plated on MacConkey agar to ensure that there were no  
399 commensal organisms with a similar morphologic appearance.

400

#### 401 **Transmission electron microscopy**

402 A 4- to 5-mm length of ileum containing a PP was excised from a control mouse, and three  
403 separate 4- to 5-mm sections of ileum (~1 cm apart) were removed from PP-deficient mice.  
404 Two mice per group were examined. All tissue samples were incubated overnight in  
405 fixative (1.25% formaldehyde, 2.5% glutaraldehyde, and 0.03% picric acid in 0.1 M sodium  
406 cacodylate buffer, pH 7.4). Samples then underwent osmication, uranyl acetate staining,  
407 and dehydration in alcohols and were embedded in TAAB 812 Resin (Marivac Ltd.; Nova  
408 Scotia, Canada). Sections (80 nm) were cut with an Ultracut microtome (Leica; Buffalo  
409 Grove, IL), picked up on 100-mesh formvar/carbon-coated grids, and stained with 0.2%  
410 lead citrate. Microscopy was performed with a 1200EX transmission electron microscope  
411 (JEOL; Peabody, MA) at 80 kV with primary magnification of 500x–15,000x.

412

#### 413 **Intestinal permeability**

414 Control and PP-deficient mice were gavaged with 8 mg of FITC-dextran (4 kDa; Sigma) per  
415 10 g of body weight. The mice were sacrificed 4 h later, and blood was obtained via cardiac  
416 puncture. The serum concentration of FITC-dextran was measured with a Synergy HT  
417 fluorimeter (BioTek; Winooski, VT) and determined based on an 8-point standard curve.

418

#### 419 **Cultured intestinal segments**

420 The distal 5 cm of the ileum and the proximal 5 cm of the colon were harvested, flushed of  
421 contents, opened longitudinally, and cultured for 24 h in RPMI containing  
422 penicillin/streptomycin and 5% FBS. The supernatant was stored at -80°C until analysis.  
423 Concentrations of CCL25 and CCL28 were measured in the supernatant by ELISA (R&D  
424 Systems; Minneapolis, MN).

425

#### 426 **IgA ELISA**

427 Feces were collected, homogenized in 1 ml of PBS, and filtered through a 100- $\mu$ m cell  
428 strainer to remove particulate matter. For small-intestinal contents, the distal 5 cm of the  
429 ileum was harvested and flushed with PBS, and the contents were filtered through a 100-  
430  $\mu$ m cell strainer. The concentrations of IgA in the fecal extract, small-intestinal content  
431 extract, and supernatants from the cultured intestinal segments were measured with an  
432 IgA ELISA Quantitation Set (Bethyl Laboratories; Montgomery, TX) according to the  
433 manufacturer's instructions.

434

#### 435 **Isolation of lymphocytes and flow cytometry**

436 Small-intestinal, cecal, and colonic LP lymphocytes were isolated as previously described<sup>31</sup>.  
437 In brief, tissues were collected, cleaned of mesenteric fat, and flushed of intestinal contents,  
438 and PPs were removed. The tissue segments were inverted, and the epithelial layer was  
439 dissociated by incubation in RPMI containing 1.6% FBS, 0.015% DTT, and 1 mM EDTA for  
440 15 min at 37°C, with constant stirring at 575 rpm. After washing in RPMI to remove  
441 residual mucus, the intestinal segments were finely minced and then incubated in RPMI  
442 containing dispase (0.5 mg/ml; Sigma), collagenase II (1.5 mg/ml; Sigma), and 1.2% FBS

443 for 40 min at 37°C, with constant stirring at 575 rpm. The digested tissue was serially  
444 filtered through a 100- $\mu$ m and a 40- $\mu$ m cell strainer prior to flow cytometric analysis. To  
445 isolate lymphocytes from spleen, MLNs, and PPs, the organs were pressed through a 70- $\mu$ m  
446 cell strainer. Splenic cells were subsequently incubated in ACK lysis buffer for 2 min on ice  
447 and washed in RPMI containing 2% FBS. Lungs were minced and incubated in RPMI  
448 containing collagenase (1.5 mg/ml) and DNase I (150  $\mu$ g/ml; Worthington Biochemical  
449 Corp; Lakewood, NJ) for 1 h at 37°C, with constant stirring at 575 rpm. The digested tissue  
450 was filtered through a 40- $\mu$ m cell strainer, incubated in ACK lysis buffer for 2 min on ice,  
451 and washed with RPMI containing 2% FBS. For peritoneal lymphocytes, the peritoneal  
452 cavity was lavaged with 10 ml of PBS. All samples were resuspended in RPMI containing  
453 2% FBS prior to antibody staining for flow cytometric characterization.

454 For flow cytometric detection of M cells, small-intestinal epithelial cells were  
455 isolated by the above approach. A primary antibody to GP2 (2F11-C3; MBL Life Science),  
456 followed by a PE-conjugated secondary antibody (Biolegend), was used.

457 Fluorophore-conjugated antibodies to the following antigens were used (with  
458 clones listed in parentheses): CD45 (30-F11), TCR $\beta$  (H57-97), TCR $\gamma\delta$  (UC7-13D5), CD4  
459 (GK1.5), CD19 (6D5), CD11b (M1/70), CD11c (N418), B220 (RA3-6B2), IgA (C10-3; BD  
460 Biosciences), CD1d (1B1), CD5 (53-7.3), and CD43 (S11). All antibodies were from  
461 Biolegend unless indicated otherwise. Cells were permeabilized with the  
462 Foxp3/Transcription Factor Staining Buffer Set (eBiosciences) for intracellular staining of  
463 IgA. A fixable viability dye conjugated to eFluor 780 (eBioscience) was included in all  
464 stains. Flow cytometry was performed with a MACSQuant Analyzer (Miltenyi Biotec), and  
465 data were analyzed with FlowJo software (FlowJo; Ashland, OR).

466

### 467 **Adoptive transfer**

468 PPs and spleens were harvested from B6 CD45.1<sup>+</sup> and B6 CD45.1<sup>+</sup> CD45.2<sup>+</sup> mice,  
469 respectively. Cells were enumerated, washed twice in PBS, and pooled together.  
470 Approximately 3 x 10<sup>6</sup> PP cells and 1.7 x 10<sup>7</sup> splenocytes were injected IV into each  
471 recipient PP-deficient mouse (C57BL/6). Three days after adoptive transfer, the recipient  
472 mice were sacrificed, and the small-intestinal and colonic LPs were assessed by flow  
473 cytometry. The mice had ~3–5% donor cells (either PP cells or splenocytes) in each organ.  
474 For CD19<sup>+</sup> and CD4<sup>+</sup> cells, we calculated the percentage of PP-derived donor cells as  
475 follows: # CD45.1<sup>+</sup> CD45.2<sup>-</sup> / # CD45.1<sup>+</sup> CD45.2<sup>+/-</sup> [alternatively described as PP cells/(PP  
476 cells + splenocytes)].

477

### 478 **Real-time RT-PCR**

479 In accordance with the manufacturers' instructions, RNA was extracted from ileal and  
480 colonic samples with TRIzol (Ambion), and complementary DNA was generated with the  
481 SuperScript III First-Strand Synthesis System (Invitrogen). Real-time RT-PCR was  
482 performed with a SYBR Select Master Mix (Applied Biosystems) and a LightCycler 480 II  
483 (Roche). Values were normalized to the expression of GAPDH for each sample. The  
484 following previously validated primer sets were used: GAPDH<sup>32</sup>—F, 5'-  
485 CCTCGTCCCGTAGACAAAATG-3', and R, 5'-TCTCCACTTTGCCACTGCAA-3'; MADCAM1<sup>33</sup>—F,  
486 5'-CCTGAGTCTGAGGTAGCTGTGG-3', and R, 5'-GAGTGCCTGTGTGTCTGACAGCAT-3';  
487 CXCL13<sup>34</sup>—F, 5'-CAGAATGAGGCTCAGCACAGC-3', and R, 5'-CAGAATACCGTGGCCTGGAG-3'.

488

## 489 **Parabiosis**

490 Parabiosis surgery was performed as previously described<sup>35</sup>. In brief, sex-matched  
491 congenic partners were anaesthetized with a mixture of ketamine (100 mg/kg of body  
492 weight), xylazine (10 mg/kg of body weight), and acepromazine (3 mg/kg of body weight)  
493 by IP injection. The corresponding lateral aspects of mice were shaved, two matching skin  
494 incisions were made from the olecranon to the knee joint of each mouse, and the  
495 subcutaneous fascia was bluntly dissected to create about 0.5 cm of free skin. The  
496 olecranon and knee joints were attached by a double 4-0 suture, and staples or a  
497 continuous 6-0 suture was used to approximate the dorsal and ventral skin flaps. The mice  
498 were then kept on heating pads and continuously monitored until recovery. Flunixin (2.5  
499 mg/kg body of weight) and buprenorphine (0.05–0.1 mg/kg of body weight) were  
500 administered by subcutaneous injection for postsurgical analgesic treatment. After 2  
501 weeks, chimerism of leukocytes in the spleen was monitored to ensure equivalent blood  
502 exchange between parabiotic partners. Parabiotic pairs consisted of PP-deficient mice and  
503 WT mice and—as a control—two congenic WT mice.

504

## 505 **TNBS colitis**

506 TNBS colitis was induced as previously described<sup>36</sup>. In brief, SW mice were sensitized on  
507 the back with 150  $\mu$ l of 1% TNBS (Sigma). A week later, the mice were rectally challenged  
508 with 60  $\mu$ g of TNBS (prepared in 50% ethanol)/g of body weight. Daily weights were  
509 assessed, and the mice were sacrificed 3 days after rectal challenge. The disease score  
510 represents the summation of the following features: (1) weight loss (scored as follows:  
511 <5%=0, 5–10%=1, 10–15%=2, 15–20%=3, and >20%=4); (2) colon length (scored as

512 follows: >9 cm=0, 8–9 cm=1, 7–8 cm=2, 6–7 cm=3, <6 cm=4); (3) stool consistency (scored  
513 as follows: normal appearing=0, soft pellets=1, soft stool with no formed pellets=2, liquid  
514 stool=3, appearance of frank blood=4); (4) colon thickness (subjectively scored as 0–4,  
515 with 0 being normal); and (5) histology (scored as 0–4, with 0 being normal, by a  
516 pathologist blinded to treatment group). As a control, mice that were not sensitized with  
517 TNBS and rectally challenged with 50% ethanol (without TNBS) had disease scores of 0–2.

518

### 519 **Quantitative rDNA analysis**

520 To quantitatively assess the burden of mucosa-associated bacteria in the intestine, the  
521 distal 5 cm of ileum or colon was harvested and flushed with PBS to remove luminal  
522 bacteria. The remaining tissue was opened longitudinally and vigorously washed in PBS to  
523 liberate the bacteria more closely associated with the epithelium and mucus layer. Genomic  
524 DNA was isolated from these mucosa-associated bacterial populations by bead beating  
525 followed by phenol–chloroform extraction; fluorescent primer- and probe-based chemistry  
526 and a LightCycler 480 II (Roche) were used to quantitate 16S rDNA as previously  
527 described<sup>37</sup>.

528

### 529 **Statistics**

530 Sample size estimates for each experiment were based on prior lab experience. Prism 6  
531 (GraphPad Software; La Jolla, CA) was used for all statistical analyses. All *p* values were  
532 calculated by unpaired, two-tailed Student's *t* or Mann-Whitney test, as appropriate. Data  
533 from the parabiosis experiment were analyzed by Wilcoxon test. In dot plots shown in the

534 figures, each data point represents an individual mouse, and horizontal bars represent the  
535 median value.

## Figure 1



**Figure 1. PP-deficient mice lack M cells and have impaired production of IgA.** A. CFU of aerobic and anaerobic bacteria cultured from MLNs. The dotted line represents the limit of detection. B. Ileal burden of mucosa-associated *S. Typhimurium* after oral gavage of  $10^8$  CFU. C. Number of GP2<sup>+</sup> cells in the small-intestinal epithelial layer. D. Transmission electron microscopy of the distal ileum. Arrow in left panel points to an M cell. Images are magnified 1500x, and the bar represents 2  $\mu$ m. E. Levels of fecal IgA. For all figures, control animals are shown in blue circles, PP-deficient animals are depicted by red squares. NS, not significant; \*,  $p < 0.05$ ; \*\*,  $p < 0.01$ ; \*\*\*,  $p < 0.001$ ; \*\*\*\*,  $p < 0.0001$ . Data are representative of  $\geq 2$  independent experiments.

## Figure 2



**Figure 2. PP-deficient mice have decreased numbers of colonic B cells.** A, B, D. Numbers of CD45<sup>+</sup> (A), TCRβ<sup>+</sup> (B), and CD19<sup>+</sup> (D) cells in the spleen, MLNs, small-intestinal lamina propria (SI), and colonic lamina propria. C. Frequencies of CD19<sup>+</sup> cells (gated on live CD45<sup>+</sup> cells) in the same organs. E. Frequency of CD19<sup>+</sup> cells in the lung. F. Frequencies of plasmablasts (B220<sup>+</sup> IgA<sup>+</sup>) and plasma cells (B220<sup>-</sup> IgA<sup>+</sup>) in the colonic lamina propria. NS, not significant; \*,  $p < 0.05$ ; \*\*,  $p < 0.01$ . Data are pooled from a minimum of 3 independent experiments.

## Figure 3



**Figure 3. A subset of colonic B cells is derived from Peyer's patches.** A, B. Numbers of CD19<sup>+</sup> cells in peritoneal lavage fluid (A) and the cecum (B). C. Number of CD19<sup>+</sup> cells in the colonic lamina propria of GF animals colonized with the microbiota of either control or PP-deficient mice. D. Schematic of parabolic mice generated. E. Percentage of colonic CD19<sup>+</sup> cells in the indicated host mouse that is derived from the parabiont partner. Lines connect parabiont partners. F, G. Correlation of the numbers of CD19<sup>+</sup> (F) and TCRβ<sup>+</sup> (G) cells between PPs and the spleen (red squares), colon (blue circles), or small intestine (SI; yellow triangles). H. Number of colonic CD19<sup>+</sup> cells in control mice, PP-deficient mice (exposed to an antibody to IL-7Rα at E15), and mice prenatally exposed to IL-7Rα antibody at E18. I, J. Fraction of PP-derived CD19<sup>+</sup> (I) and IgA<sup>+</sup> (CD19<sup>+</sup> in dark bars and CD19<sup>-</sup> in gray bars) (J) cells in the input, the SI, or the colon (*n*=4 recipients for I and J). NS, not significant; \*, *p*<0.05; \*\*, *p*<0.01. Data are pooled (A, B, E–H) or representative of ≥2 independent experiments (C, I, J).

## Figure 4



**Figure 4. PP-derived colonic B cells regulate the colonic immune response in inflammatory and healthy conditions.** A, B. Fecal (A) and colonic (B) burden of *C. rodentium* 8 days after oral gavage of control and PP-deficient mice with  $5 \times 10^8$  CFU of *C. rodentium*. C, D. Serial weights (C) and disease score (D) for control mice (blue circles) and mice prenatally exposed to IL-7R $\alpha$  antibody at E14 (PP-deficient; red squares) or E18 (green triangles) and then subjected to TNBS-induced colitis. E. Levels of fecal IgA in the indicated host mouse 2 weeks after parabiosis with the listed partner. F. Colonic segments were harvested from control and PP-deficient mice and cultured *ex vivo*. The IgA concentration in the supernatant was measured. G. qPCR-based quantification of mucosa-associated bacteria in the colon. NS, not significant; \*,  $p < 0.05$ ; \*\*,  $p < 0.01$ ; \*\*\*,  $p < 0.001$ ; \*\*\*\*,  $p < 0.0001$ . Data are pooled (C–D) or representative of  $\geq 2$  independent experiments (A–B, E–G).
